# Supplementary material
Source: PubMed Central journal article supplement (PMC4696564)
Supplement: ASN.2014090850_ASN2014090850SupplementaryData.pdf [file ASN.2014090850_ASN2014090850SupplementaryData.pdf]

**Supplemental Data**

**Inhibition of SET Domain-Containing Lysine Methyltransferase 7/9  
Ameliorates Renal Fibrosis**

Kensuke Sasaki,<sup>1</sup> Shigehiro Doi,<sup>1\*</sup> Ayumu Nakashima,<sup>1</sup> Taisuke Irifuku,<sup>1</sup> Kyoko Yamada,<sup>1</sup> Keiko Kokoroishi,<sup>1</sup> Toshinori Ueno,<sup>1</sup> Toshiki Doi,<sup>1</sup> Eisuke Hida,<sup>2</sup> Koji Arihiro,<sup>3</sup> Nobuoki Kohno,<sup>4</sup> and Takao Masaki<sup>1\*</sup>

<sup>1</sup>Department of Nephrology, Hiroshima University Hospital, Hiroshima, Japan; <sup>2</sup>Center for Integrated Medical Research, Hiroshima University Hospital, Hiroshima, Japan; <sup>3</sup>Department of Pathology, Hiroshima University Hospital, Hiroshima, Japan; and <sup>4</sup>Department of Molecular and Internal Medicine, Graduate School of Biomedical & Health Sciences, Hiroshima University, Hiroshima, Japan

\*CORRESPONDENCE TO:

Shigehiro Doi, M.D., Ph.D. Assistant Professor  
Department of Nephrology, Hiroshima University Hospital  
1-2-3 Kasumi, Minami-Ku, Hiroshima 734-8551, Japan  
E-mail: [sdoi@hiroshima-u.ac.jp](mailto:sdoi@hiroshima-u.ac.jp)  
TEL: +81-82-257-5960  
FAX: +81-82-256-5560

Takao Masaki, M.D., Ph.D. Professor  
Department of Nephrology, Hiroshima University Hospital  
1-2-3 Kasumi, Minami-Ku, Hiroshima 734-8551, Japan  
E-mail: [masakit@hiroshima-u.ac.jp](mailto:masakit@hiroshima-u.ac.jp)  
TEL: +81-82-257-1506  
FAX: +81-82-257-1508

This Supplemental Data includes:  
Supplemental Table 1 - 2

**Table 1. Clinical characteristics of IgAN patients**

| eGFR, mL/min/1.73m <sup>2</sup> | 83.0 - 118.0<br>(n = 8) | 64.9 - 80.3<br>(n = 6) | 40.2 - 64.0<br>(n = 12) |
|---------------------------------|-------------------------|------------------------|-------------------------|
| Age, years                      | 28 ± 10                 | 34 ± 9                 | 47 ± 10                 |
| Sex, M/F                        | 5/3                     | 4/2                    | 10/2                    |
| BMI, kg/m <sup>2</sup>          | 21 ± 4.2                | 21 ± 1.5               | 24 ± 2.5                |
| Ccr, mL/min                     | 114.6 ± 18.43           | 82.27 ± 10.74          | 76.55 ± 19.77           |
| eGFR, mL/min/1.73m <sup>2</sup> | 99 ± 12                 | 74 ± 5                 | 54 ± 7                  |
| Urinary protein, g/24 h         | 0.19 ± 0.12             | 0.51 ± 0.42            | 0.99 ± 0.81             |
| Renal fibrosis, %               | 4.4 ± 2.7               | 9.9 ± 1.1              | 15.2 ± 4.4              |

Values indicate means ± SD

BMI, body mass index; Ccr, creatinine clearance; eGFR, estimated glomerular filtration rate

**Table 2. Clinical characteristics of MN patients**

| eGFR, mL/min/1.73m <sup>2</sup> | 75.0 - 84.5<br>(n = 4) | 64.6 - 74.4<br>(n = 4) | 48.6 - 63.4<br>(n = 4) |
|---------------------------------|------------------------|------------------------|------------------------|
| Age, years                      | 66 ± 9                 | 66 ± 7                 | 73 ± 4                 |
| Sex, M/F                        | 2/2                    | 3/1                    | 3/1                    |
| BMI, kg/m <sup>2</sup>          | 22 ± 4.3               | 23 ± 1.1               | 24 ± 1.2               |
| Ccr, mL/min                     | 103.9 ± 20.85          | 89.1 ± 13.06           | 74.1 ± 9.70            |
| eGFR, mL/min/1.73m <sup>2</sup> | 79 ± 3.5               | 71 ± 3.8               | 56 ± 5.4               |
| Urinary protein, g/24 h         | 4.37 ± 3.15            | 2.86 ± 1.07            | 3.35 ± 1.31            |
| Renal fibrosis, %               | 6.7 ± 1.5              | 8.2 ± 1.2              | 8.8 ± 0.5              |

Values indicate means ± SD

BMI, body mass index; Ccr, creatinine clearance; eGFR, estimated glomerular filtration rate
